# Supplementary material for: Causal language and strength of inference in academic and media articles shared in social media (CLAIMS): A systematic review
Source: PubMed Central journal article supplement (PMC5976147; doi:10.1371/journal.pone.0196346), 2018-05-30
Supplement: pone.0196346.s003.pdf [file pone.0196346.s003.pdf]

| <b>Media domains</b>           | <b>% (n)</b> | <b>Institutions</b>                               | <b>% (n)</b> | <b>Journals (impact factor)</b>               | <b>% (n)</b> |
|--------------------------------|--------------|---------------------------------------------------|--------------|-----------------------------------------------|--------------|
| cbsnews.com                    | 9% (6)       | Harvard University                                | 18% (9)      | J Epidemiol Community Health (4)              | 8% (4)       |
| nytimes.com                    | 9% (6)       | Johns Hopkins University                          | 8% (4)       | Am J Public Health (4)                        | 6% (3)       |
| theguardian.com                | 9% (6)       | Brigham and Women's Hospital                      | 6% (3)       | PLOS One (3)                                  | 6% (3)       |
| latimes.com                    | 6% (4)       | Duke University                                   | 6% (3)       | BMJ (17)                                      | 4% (2)       |
| npr.org                        | 6% (4)       | Indiana University                                | 6% (3)       | Circulation (17)                              | 4% (2)       |
| yahoo.com                      | 6% (4)       | Massachusetts General Hospital                    | 6% (3)       | Heart (6)                                     | 4% (2)       |
| bbc.co.uk                      | 5% (3)       | Stanford University                               | 6% (3)       | Hypertension (6)                              | 4% (2)       |
| independent.co.uk              | 5% (3)       | University College London                         | 6% (3)       | J Am Coll Cardiol (18)                        | 4% (2)       |
| washingtonpost.com             | 5% (3)       | University of California San Francisco            | 6% (3)       | Lancet (44)                                   | 4% (2)       |
| cnn.com                        | 3% (2)       | Yale University                                   | 6% (3)       | N Engl J Med (60)                             | 4% (2)       |
| today.com                      | 3% (2)       | Academic Medical Center                           | 4% (2)       | Proc Natl Acad Sci U S A (9)                  | 4% (2)       |
| aarp.org                       | 2% (1)       | CIBER of Epidemiology and Public Health           | 4% (2)       | Ann Behav Med (4)                             | 2% (1)       |
| bustle.com                     | 2% (1)       | George Washington University                      | 4% (2)       | Cell Metab (17)                               | 2% (1)       |
| citylab.com                    | 2% (1)       | London School of Economics and Political Science  | 4% (2)       | Computers in Human Behavior (3)               | 2% (1)       |
| dailymail.co.uk                | 2% (1)       | New York University                               | 4% (2)       | Demography (3)                                | 2% (1)       |
| globalnews.ca                  | 2% (1)       | University of Aberdeen                            | 4% (2)       | Environ Health Perspect (8)                   | 2% (1)       |
| harvard.edu                    | 2% (1)       | University of California Los Angeles              | 4% (2)       | Int J Environ Res Public Health (2)           | 2% (1)       |
| hellogiggles.com               | 2% (1)       | University of São Paulo                           | 4% (2)       | J Adolesc Health (4)                          | 2% (1)       |
| huffingtonpost.com             | 2% (1)       | University of Southern California                 | 4% (2)       | J Am Coll Surg (4)                            | 2% (1)       |
| indiatimes.com                 | 2% (1)       | Uppsala University                                | 4% (2)       | J Natl Cancer Inst (14)                       | 2% (1)       |
| instinctmagazine.com           | 2% (1)       | AARP                                              | 2% (1)       | J Neurotrauma (4)                             | 2% (1)       |
| news.yahoo.com                 | 2% (1)       | Aga Khan University                               | 2% (1)       | J Public Health (Oxf) (2)                     | 2% (1)       |
| nydailynews.com                | 2% (1)       | Alliant International University                  | 2% (1)       | JAMA (38)                                     | 2% (1)       |
| nypost.com                     | 2% (1)       | American Cancer Society                           | 2% (1)       | JAMA Intern Med (14)                          | 2% (1)       |
| rt.com                         | 2% (1)       | Baptist Health South Florida                      | 2% (1)       | JAMA Pediatr (10)                             | 2% (1)       |
| sky.com                        | 2% (1)       | Bassett Medical Center                            | 2% (1)       | Lancet Psychiatry (6)                         | 2% (1)       |
| telegraph.co.uk                | 2% (1)       | Boston College                                    | 2% (1)       | Obesity (Silver Spring) (4)                   | 2% (1)       |
| theautismsite.com              | 2% (1)       | Boston University                                 | 2% (1)       | Pediatrics (5)                                | 2% (1)       |
| thegailygrind.com              | 2% (1)       | Cancer Care Ontario                               | 2% (1)       | PLOS Genet (7)                                | 2% (1)       |
| thetrace.org                   | 2% (1)       | Centre for Research in Environmental Epidemiology | 2% (1)       | PLOS Med (14)                                 | 2% (1)       |
| thinkprogress.org              | 2% (1)       | Chinese Academy of Medical Sciences               | 2% (1)       | Prev Chronic Dis (2)                          | 2% (1)       |
| yale.edu                       | 2% (1)       | Chulalongkorn University                          | 2% (1)       | Prev Med (3)                                  | 2% (1)       |
|                                |              | Clinical Center Nutrition Department              | 2% (1)       | Psychol Aging (3)                             | 2% (1)       |
|                                |              | Columbia University                               | 2% (1)       | Schizophr Res (4)                             | 2% (1)       |
|                                |              | Dartmouth University                              | 2% (1)       | Sci Rep (5)                                   | 2% (1)       |
|                                |              | ...                                               |              |                                               |              |
| <b>Total: 32 domains</b>       |              | <b>Total: 192 institutions</b>                    |              | <b>Total: 35 journals, impact factor 2-60</b> |              |
| Denominator: 64 media articles |              | Denominator: 50 academic studies                  |              | Denominator: 50 academic studies              |              |
