# Supplementary material for: Causal language and strength of inference in academic and media articles shared in social media (CLAIMS): A systematic review
Source: PubMed Central journal article supplement (PMC5976147; doi:10.1371/journal.pone.0196346), 2018-05-30
Supplement: pone.0196346.s004.pdf [file pone.0196346.s004.pdf]

| Citation                                                                                                                                                                                                                                                                                                                                                                                                                                                                                                                                                                                                                                                                                                                                                                                                                                                                       | Strength of causal inference | Most severe issue (severity)                                                                   | Language matches strength                                |
|--------------------------------------------------------------------------------------------------------------------------------------------------------------------------------------------------------------------------------------------------------------------------------------------------------------------------------------------------------------------------------------------------------------------------------------------------------------------------------------------------------------------------------------------------------------------------------------------------------------------------------------------------------------------------------------------------------------------------------------------------------------------------------------------------------------------------------------------------------------------------------|------------------------------|------------------------------------------------------------------------------------------------|----------------------------------------------------------|
| Allen, J.G., MacNaughton, P., Satish, U., Santanam, S., Vallarino, J., and Spengler, J.D., Associations of Cognitive Function Scores with Carbon Dioxide, Ventilation, and Volatile Organic Compound Exposures in Office Workers: A Controlled Exposure Study of Green and Conventional Office Environments. <i>Environ Health Perspect</i> , 2016. 124(6): p. 805-12                                                                                                                                                                                                                                                                                                                                                                                                                                                                                                          | Very high                    | Generalizability (Low)                                                                         | No, language too weak for strength of causal inference   |
| Andersson, O., Lindquist, B., Lindgren, M., Stjernqvist, K., Domellof, M., and Hellstrom-Westas, L., Effect of Delayed Cord Clamping on Neurodevelopment at 4 Years of Age: A Randomized Clinical Trial. <i>JAMA Pediatr</i> , 2015. 169(7): p. 631-8                                                                                                                                                                                                                                                                                                                                                                                                                                                                                                                                                                                                                          | Moderate                     | Generalizability (High)                                                                        | Yes, language matches strength of causal inference       |
| Barr, B., Taylor-Robinson, D., Stuckler, D., Loopstra, R., Reeves, A., and Whitehead, M., 'First, do no harm': are disability assessments associated with adverse trends in mental health? A longitudinal ecological study. <i>J Epidemiol Community Health</i> , 2016. 70(4): p. 339-45                                                                                                                                                                                                                                                                                                                                                                                                                                                                                                                                                                                       | Moderate                     | Methods (Moderate)                                                                             | No, language too weak for strength of causal inference   |
| Berkman, L.F., Zheng, Y., Glymour, M.M., Avendano, M., Borsch-Supan, A., and Sabbath, E.L., Mothering alone: cross-national comparisons of later-life disability and health among women who were single mothers. <i>J Epidemiol Community Health</i> , 2015. 69(9): p. 865-72                                                                                                                                                                                                                                                                                                                                                                                                                                                                                                                                                                                                  | Very low                     | Covariates, Methods (Very high)                                                                | No, language too strong for strength of causal inference |
| Black, M., Bhattacharya, S., Philip, S., Norman, J.E., and McLernon, D.J., Planned Cesarean Delivery at Term and Adverse Outcomes in Childhood Health. <i>JAMA</i> , 2015. 314(21): p. 2271-9                                                                                                                                                                                                                                                                                                                                                                                                                                                                                                                                                                                                                                                                                  | Low                          | Methods (Very high)                                                                            | Yes, language matches strength of causal inference       |
| Bratman, G.N., Hamilton, J.P., Hahn, K.S., Daily, G.C., and Gross, J.J., Nature experience reduces rumination and subgenual prefrontal cortex activation. <i>Proc Natl Acad Sci U S A</i> , 2015. 112(28): p. 8567-72                                                                                                                                                                                                                                                                                                                                                                                                                                                                                                                                                                                                                                                          | Moderate                     | Covariates, Outcome assessment (Moderate)                                                      | Yes, language matches strength of causal inference       |
| Choi, Y., Chang, Y., Ryu, S., Cho, J., Rampal, S., Zhang, Y., Ahn, J., Lima, J.A., Shin, H., and Guallar, E., Coffee consumption and coronary artery calcium in young and middle-aged asymptomatic adults. <i>Heart</i> , 2015. 101(9): p. 686-91                                                                                                                                                                                                                                                                                                                                                                                                                                                                                                                                                                                                                              | Low                          | Covariates, Methods, Generalizability, Exposure assessment, Missing data (Moderate)            | Yes, language matches strength of causal inference       |
| Dadvand, P., Nieuwenhuijsen, M.J., Esnaola, M., Forns, J., Basagana, X., Alvarez-Pedrerol, M., Rivas, I., Lopez-Vicente, M., De Castro Pascual, M., Su, J., Jerrett, M., Querol, X., and Sunyer, J., Green spaces and cognitive development in primary schoolchildren. <i>Proc Natl Acad Sci U S A</i> , 2015. 112(26): p. 7937-42                                                                                                                                                                                                                                                                                                                                                                                                                                                                                                                                             | Moderate                     | Outcome assessment (High)                                                                      | Yes, language matches strength of causal inference       |
| Derraik, J.G., Ahlsson, F., Lundgren, M., Jonsson, B., and Cutfield, W.S., First-borns have greater BMI and are more likely to be overweight or obese: a study of sibling pairs among 26,812 Swedish women. <i>J Epidemiol Community Health</i> , 2016. 70(1): p. 78-81                                                                                                                                                                                                                                                                                                                                                                                                                                                                                                                                                                                                        | Low                          | Covariates (Very high)                                                                         | Yes, language matches strength of causal inference       |
| Ding, M., Satija, A., Bhupathiraju, S.N., Hu, Y., Sun, Q., Han, J., Lopez-Garcia, E., Willett, W., van Dam, R.M., and Hu, F.B., Association of Coffee Consumption With Total and Cause-Specific Mortality in 3 Large Prospective Cohorts. <i>Circulation</i> , 2015. 132(24): p. 2305-15                                                                                                                                                                                                                                                                                                                                                                                                                                                                                                                                                                                       | Moderate                     | Generalizability (High)                                                                        | Yes, language matches strength of causal inference       |
| Figueiredo, J.C., Hsu, L., Hutter, C.M., Lin, Y., Campbell, P.T., Baron, J.A., Berndt, S.I., Jiao, S., Casey, G., Fortini, B., Chan, A.T., Cotterchio, M., Lemire, M., Gallinger, S., Harrison, T.A., Le Marchand, L., Newcomb, P.A., Slattery, M.L., Caan, B.J., Carlson, C.S., Zanke, B.W., Rosse, S.A., Brenner, H., Giovannucci, E.L., Wu, K., Chang-Claude, J., Chanock, S.J., Curtis, K.R., Duggan, D., Gong, J., Haile, R.W., Hayes, R.B., Hoffmeister, M., Hopper, J.L., Jenkins, M.A., Kolonel, L.N., Qu, C., Rudolph, A., Schoen, R.E., Schumacher, F.R., Seminara, D., Stelling, D.L., Thibodeau, S.N., Thornquist, M., Warnick, G.S., Henderson, B.E., Ulrich, C.M., Gauderman, W.J., Potter, J.D., White, E., Peters, U., Ccfr, and Gecco, Genome-wide diet-gene interaction analyses for risk of colorectal cancer. <i>PLoS Genet</i> , 2014. 10(4): p. e1004228 | Low                          | Covariates, Methods (Very high)                                                                | Yes, language matches strength of causal inference       |
| Fountain, C., Zhang, Y., Kissin, D.M., Schieve, L.A., Jamieson, D.J., Rice, C., and Bearman, P., Association between assisted reproductive technology conception and autism in California, 1997-2007. <i>Am J Public Health</i> , 2015. 105(5): p. 963-71                                                                                                                                                                                                                                                                                                                                                                                                                                                                                                                                                                                                                      | Low                          | Covariates (Very high)                                                                         | Yes, language matches strength of causal inference       |
| Freemantle, N., Ray, D., McNulty, D., Rosser, D., Bennett, S., Keogh, B.E., and Pagano, D., Increased mortality associated with weekend hospital admission: a case for expanded seven day services? <i>Bmj</i> , 2015. 351: p. h4596                                                                                                                                                                                                                                                                                                                                                                                                                                                                                                                                                                                                                                           | Low                          | Covariates, Methods (Moderate)                                                                 | No, language too strong for strength of causal inference |
| Gadomski, A.M., Scribani, M.B., Krupa, N., Jenkins, P., Nagykaldi, Z., and Olson, A.L., Pet Dogs and Children's Health: Opportunities for Chronic Disease Prevention? <i>Prev Chronic Dis</i> , 2015. 12: p. E205                                                                                                                                                                                                                                                                                                                                                                                                                                                                                                                                                                                                                                                              | Very low                     | Covariates, Generalizability (High)                                                            | Yes, language matches strength of causal inference       |
| Gauderman, W.J., Urman, R., Avol, E., Berhane, K., McConnell, R., Rappaport, E., Chang, R., Lurmann, F., and Gilliland, F., Association of improved air quality with lung development in children. <i>N Engl J Med</i> , 2015. 372(10): p. 905-13                                                                                                                                                                                                                                                                                                                                                                                                                                                                                                                                                                                                                              | Moderate                     | Covariates, Exposure assessment (Moderate)                                                     | Yes, language matches strength of causal inference       |
| Gorman, B.K., Denney, J.T., Dowdy, H., and Medeiros, R.A., A New Piece of the Puzzle: Sexual Orientation, Gender, and Physical Health Status. <i>Demography</i> , 2015. 52(4): p. 1357-82                                                                                                                                                                                                                                                                                                                                                                                                                                                                                                                                                                                                                                                                                      | Moderate                     | Covariates, Generalizability, Exposure assessment, Outcome assessment, Missing data (Moderate) | Yes, language matches strength of causal inference       |
| Hall, K.D., Bemis, T., Brychta, R., Chen, K.Y., Courville, A., Crayner, E.J., Goodwin, S., Guo, J., Howard, L., Knuth, N.D., Miller, B.V., 3rd, Prado, C.M., Siervo, M., Skarulis, M.C., Walter, M., Walter, P.J., and Yannai, L., Calorie for Calorie, Dietary Fat Restriction Results in More Body Fat Loss than Carbohydrate Restriction in People with Obesity. <i>Cell Metab</i> , 2015. 22(3): p. 427-36                                                                                                                                                                                                                                                                                                                                                                                                                                                                 | Moderate                     | Generalizability (Very high)                                                                   | No, language too strong for strength of causal inference |

|                                                                                                                                                                                                                                                                                                                                                                                                                                                                                                   |           |                                                                                            |                                                          |
|---------------------------------------------------------------------------------------------------------------------------------------------------------------------------------------------------------------------------------------------------------------------------------------------------------------------------------------------------------------------------------------------------------------------------------------------------------------------------------------------------|-----------|--------------------------------------------------------------------------------------------|----------------------------------------------------------|
| Heida, K.Y., Franx, A., van Rijn, B.B., Eijkemans, M.J., Boer, J.M., Verschuren, M.W., Oudijk, M.A., Bots, M.L., and van der Schouw, Y.T., Earlier Age of Onset of Chronic Hypertension and Type 2 Diabetes Mellitus After a Hypertensive Disorder of Pregnancy or Gestational Diabetes Mellitus. <i>Hypertension</i> , 2015. 66(6): p. 1116-22                                                                                                                                                   | Low       | Covariates (Very high)                                                                     | No, language too strong for strength of causal inference |
| Hemenway, D. and Solnick, S.J., The epidemiology of self-defense gun use: evidence from the National Crime Victimization Surveys 2007-2011. <i>Prev Med</i> , 2015. 79: p. 22-7                                                                                                                                                                                                                                                                                                                   | Low       | Covariates, Methods, Exposure assessment, Outcome assessment, Missing data (Very high)     | Yes, language matches strength of causal inference       |
| Insight Start Study Group, Lundgren, J.D., Babiker, A.G., Gordin, F., Emery, S., Grund, B., Sharma, S., Avihingsanon, A., Cooper, D.A., Fatkenheuer, G., Llibre, J.M., Molina, J.M., Munderi, P., Schechter, M., Wood, R., Klingman, K.L., Collins, S., Lane, H.C., Phillips, A.N., and Neaton, J.D., Initiation of Antiretroviral Therapy in Early Asymptomatic HIV Infection. <i>N Engl J Med</i> , 2015. 373(9): p. 795-807                                                                    | Very high | Covariates, Methods, Generalizability, Outcome assessment, Missing data (Low)              | Yes, language matches strength of causal inference       |
| Jones, D.E., Greenberg, M., and Crowley, M., Early Social-Emotional Functioning and Public Health: The Relationship Between Kindergarten Social Competence and Future Wellness. <i>Am J Public Health</i> , 2015. 105(11): p. 2283-90                                                                                                                                                                                                                                                             | Low       | Exposure assessment (Very high)                                                            | Yes, language matches strength of causal inference       |
| Kardan, O., Gozdyra, P., Mistic, B., Moola, F., Palmer, L.J., Paus, T., and Berman, M.G., Neighborhood greenspace and health in a large urban center. <i>Sci Rep</i> , 2015. 5: p. 11610                                                                                                                                                                                                                                                                                                          | Low       | Methods (Very high)                                                                        | No, language too strong for strength of causal inference |
| Kovesdy, C.P., Norris, K.C., Boulware, L.E., Lu, J.L., Ma, J.Z., Streja, E., Molnar, M.Z., and Kalantar-Zadeh, K., Association of Race With Mortality and Cardiovascular Events in a Large Cohort of US Veterans. <i>Circulation</i> , 2015. 132(16): p. 1538-48                                                                                                                                                                                                                                  | Low       | Generalizability (Very high)                                                               | No, language too strong for strength of causal inference |
| Kwok, C.S., Boekholdt, S.M., Lentjes, M.A., Loke, Y.K., Luben, R.N., Yeong, J.K., Wareham, N.J., Myint, P.K., and Khaw, K.T., Habitual chocolate consumption and risk of cardiovascular disease among healthy men and women. <i>Heart</i> , 2015. 101(16): p. 1279-87                                                                                                                                                                                                                             | Low       | Covariates, Methods, Generalizability, Exposure assessment (High)                          | Yes, language matches strength of causal inference       |
| Leong, D.P., Teo, K.K., Rangarajan, S., Lopez-Jaramillo, P., Avezum, A., Jr., Orlandini, A., Seron, P., Ahmed, S.H., Rosengren, A., Kelishadi, R., Rahman, O., Swaminathan, S., Iqbal, R., Gupta, R., Lear, S.A., Oguz, A., Yusuf, K., Zatonska, K., Chifamba, J., Igumbor, E., Mohan, V., Anjana, R.M., Gu, H., Li, W., and Yusuf, S., Prognostic value of grip strength: findings from the Prospective Urban Rural Epidemiology (PURE) study. <i>Lancet</i> , 2015. 386(9990): p. 266-73        | Very low  | Covariates, Exposure assessment (Moderate)                                                 | Yes, language matches strength of causal inference       |
| Lereya, S.T., Copeland, W.E., Costello, E.J., and Wolke, D., Adult mental health consequences of peer bullying and maltreatment in childhood: two cohorts in two countries. <i>Lancet Psychiatry</i> , 2015. 2(6): p. 524-31                                                                                                                                                                                                                                                                      | Very low  | Covariates, Missing data (Very high)                                                       | No, language too strong for strength of causal inference |
| Levy, B.R., Ferrucci, L., Zonderman, A.B., Slade, M.D., Troncoso, J., and Resnick, S.M., A culture-brain link: Negative age stereotypes predict Alzheimer's disease biomarkers. <i>Psychol Aging</i> , 2016. 31(1): p. 82-8                                                                                                                                                                                                                                                                       | Low       | Covariates, Generalizability (High)                                                        | No, language too strong for strength of causal inference |
| Liu, A.Y., Cohen, S.E., Vittinghoff, E., Anderson, P.L., Doblecki-Lewis, S., Bacon, O., Chege, W., Postle, B.S., Matheson, T., Amico, K.R., Liegler, T., Rawlings, M.K., Trainor, N., Blue, R.W., Estrada, Y., Coleman, M.E., Cardenas, G., Feaster, D.J., Grant, R., Philip, S.S., Elion, R., Buchbinder, S., and Kolber, M.A., Preexposure Prophylaxis for HIV Infection Integrated With Municipal- and Community-Based Sexual Health Services. <i>JAMA Intern Med</i> , 2016. 176(1): p. 75-84 | Low       | Generalizability (Very high)                                                               | No, language too strong for strength of causal inference |
| Liu, B., Floud, S., Pirie, K., Green, J., Peto, R., and Beral, V., Does happiness itself directly affect mortality? The prospective UK Million Women Study. <i>Lancet</i> , 2016. 387(10021): p. 874-81                                                                                                                                                                                                                                                                                           | Moderate  | Exposure assessment (High)                                                                 | No, language too strong for strength of causal inference |
| Lofffield, E., Freedman, N.D., Graubard, B.I., Hollenbeck, A.R., Shebl, F.M., Mayne, S.T., and Sinha, R., Coffee drinking and cutaneous melanoma risk in the NIH-AARP diet and health study. <i>J Natl Cancer Inst</i> , 2015. 107(2)                                                                                                                                                                                                                                                             | Low       | Outcome assessment (Very high)                                                             | Yes, language matches strength of causal inference       |
| Lopez, D.S., Wang, R., Tsilidis, K.K., Zhu, H., Daniel, C.R., Sinha, A., and Canfield, S., Role of Caffeine Intake on Erectile Dysfunction in US Men: Results from NHANES 2001-2004. <i>PLoS One</i> , 2014. 10(4): p. e0123547                                                                                                                                                                                                                                                                   | Very low  | Covariates, Generalizability, Exposure assessment, Outcome assessment, Missing data (High) | Yes, language matches strength of causal inference       |
| Lustig, R.H., Mulligan, K., Noworolski, S.M., Tai, V.W., Wen, M.J., Erkin-Cakmak, A., Gugliucci, A., and Schwarz, J.M., Isocaloric fructose restriction and metabolic improvement in children with obesity and metabolic syndrome. <i>Obesity (Silver Spring)</i> , 2016. 24(2): p. 453-60                                                                                                                                                                                                        | Low       | Generalizability (High)                                                                    | Yes, language matches strength of causal inference       |
| Melis, G., Gelormino, E., Marra, G., Ferracin, E., and Costa, G., The Effects of the Urban Built Environment on Mental Health: A Cohort Study in a Large Northern Italian City. <i>Int J Environ Res Public Health</i> , 2015. 12(11): p. 14898-915                                                                                                                                                                                                                                               | Very low  | Covariates, Generalizability (Very high)                                                   | No, language too strong for strength of causal inference |
| Mokry, L.E., Ross, S., Ahmad, O.S., Forgetta, V., Smith, G.D., Goltzman, D., Leong, A., Greenwood, C.M., Thanassoulis, G., and Richards, J.B., Vitamin D and Risk of Multiple Sclerosis: A Mendelian Randomization Study. <i>PLoS Med</i> , 2015. 12(8): p. e1001866                                                                                                                                                                                                                              | High      | Generalizability (Moderate)                                                                | Yes, language matches strength of causal inference       |
| Myrick, J.G., Emotion regulation, procrastination, and watching cat videos online: Who watches Internet cats, why, and to what effect? <i>Computers in Human Behavior</i> , 2015. 52: p. 168-176                                                                                                                                                                                                                                                                                                  | Low       | Generalizability, Outcome assessment, Missing data (High)                                  | Yes, language matches strength of causal inference       |

|                                                                                                                                                                                                                                                                                                                                                                                                                                                                          |          |                                                   |                                                          |
|--------------------------------------------------------------------------------------------------------------------------------------------------------------------------------------------------------------------------------------------------------------------------------------------------------------------------------------------------------------------------------------------------------------------------------------------------------------------------|----------|---------------------------------------------------|----------------------------------------------------------|
| Nasir, K., Bittencourt, M.S., Blaha, M.J., Blankstein, R., Agatson, A.S., Rivera, J.J., Miedema, M.D., Sibley, C.T., Shaw, L.J., Blumenthal, R.S., Budoff, M.J., and Krumholz, H.M., Implications of Coronary Artery Calcium Testing Among Statin Candidates According to American College of Cardiology/American Heart Association Cholesterol Management Guidelines: MESA (Multi-Ethnic Study of Atherosclerosis). <i>J Am Coll Cardiol</i> , 2015. 66(14): p. 1577-86 | Moderate | Exposure assessment (Moderate)                    | Yes, language matches strength of causal inference       |
| Nemeth, B., Scheres, L.J., Lijfering, W.M., and Rosendaal, F.R., Bloodclotting movies and measures of coagulation: Fear Factor crossover trial. <i>BMJ</i> , 2015. 351: p. h6367                                                                                                                                                                                                                                                                                         | Low      | Covariates, Methods, Generalizability (Very high) | Yes, language matches strength of causal inference       |
| Peckham, S., Lowery, D., and Spencer, S., Are fluoride levels in drinking water associated with hypothyroidism prevalence in England? A large observational study of GP practice data and fluoride levels in drinking water. <i>J Epidemiol Community Health</i> , 2015. 69(7): p. 619-24                                                                                                                                                                                | Low      | Covariates, Methods, Exposure assessment (High)   | No, language too strong for strength of causal inference |
| Ploubidis, G.B., Silverwood, R.J., DeStavola, B., and Grundy, E., Life-Course Partnership Status and Biomarkers in Midlife: Evidence From the 1958 British Birth Cohort. <i>Am J Public Health</i> , 2015. 105(8): p. 1596-603                                                                                                                                                                                                                                           | Low      | Generalizability (Very high)                      | Yes, language matches strength of causal inference       |
| Quach, D., Jastrowski Mano, K.E., and Alexander, K., A Randomized Controlled Trial Examining the Effect of Mindfulness Meditation on Working Memory Capacity in Adolescents. <i>J Adolesc Health</i> , 2016. 58(5): p. 489-96                                                                                                                                                                                                                                            | Moderate | Generalizability (Very high)                      | No, language too strong for strength of causal inference |
| Salles, A., Mueller, C.M., and Cohen, G.L., Exploring the Relationship Between Stereotype Perception and Residents' Well-Being. <i>J Am Coll Surg</i> , 2016. 222(1): p. 52-8                                                                                                                                                                                                                                                                                            | Low      | Methods (Very high)                               | Yes, language matches strength of causal inference       |
| Shah, N.H., LePendu, P., Bauer-Mehren, A., Ghebremariam, Y.T., Iyer, S.V., Marcus, J., Nead, K.T., Cooke, J.P., and Leeper, N.J., Proton Pump Inhibitor Usage and the Risk of Myocardial Infarction in the General Population. <i>PLoS One</i> , 2015. 10(6): p. e0124653                                                                                                                                                                                                | Low      | Covariates, Exposure assessment (High)            | No, language too strong for strength of causal inference |
| Stahl, J.E., Dossett, M.L., Lajoie, A.S., Denninger, J.W., Mehta, D.H., Goldman, R., Fricchione, G.L., and Benson, H., Relaxation Response and Resiliency Training and Its Effect on Healthcare Resource Utilization. <i>PLoS One</i> , 2015. 10(10): p. e0140212                                                                                                                                                                                                        | Low      | Covariates (High)                                 | No, language too strong for strength of causal inference |
| Stamm, J.M., Koerte, I.K., Muehlmann, M., Pasternak, O., Bourlas, A.P., Baugh, C.M., Giwerc, M.Y., Zhu, A., Coleman, M.J., Bouix, S., Fritts, N.G., Martin, B.M., Chaisson, C., McClean, M.D., Lin, A.P., Cantu, R.C., Tripodis, Y., Stern, R.A., and Shenton, M.E., Age at First Exposure to Football Is Associated with Altered Corpus Callosum White Matter Microstructure in Former Professional Football Players. <i>J Neurotrauma</i> , 2015. 32(22): p. 1768-76   | Low      | Covariates, Generalizability (High)               | Yes, language matches strength of causal inference       |
| Torrey, E.F., Simmons, W., and Yolken, R.H., Is childhood cat ownership a risk factor for schizophrenia later in life? <i>Schizophr Res</i> , 2015. 165(1): p. 1-2                                                                                                                                                                                                                                                                                                       | Low      | Methods (Very high)                               | Yes, language matches strength of causal inference       |
| Trasande, L. and Attina, T.M., Association of exposure to di-2-ethylhexylphthalate replacements with increased blood pressure in children and adolescents. <i>Hypertension</i> , 2015. 66(2): p. 301-8                                                                                                                                                                                                                                                                   | Low      | Covariates, Methods (Very high)                   | Yes, language matches strength of causal inference       |
| Winning, A., Glymour, M.M., McCormick, M.C., Gilsanz, P., and Kubzansky, L.D., Psychological Distress Across the Life Course and Cardiometabolic Risk: Findings From the 1958 British Birth Cohort Study. <i>J Am Coll Cardiol</i> , 2015. 66(14): p. 1577-86                                                                                                                                                                                                            | Moderate | Generalizability (High)                           | Yes, language matches strength of causal inference       |
| Wood, C.J., Pretty, J., and Griffin, M., A case-control study of the health and well-being benefits of allotment gardening. <i>J Public Health (Oxf)</i> , 2015                                                                                                                                                                                                                                                                                                          | Low      | Covariates (Very high)                            | No, language too strong for strength of causal inference |
| Zawadzki, M.J., Smyth, J.M., and Costigan, H.J., Real-Time Associations Between Engaging in Leisure and Daily Health and Well-Being. <i>Ann Behav Med</i> , 2015. 49(4): p. 605-15                                                                                                                                                                                                                                                                                       | Very low | Covariates, Methods, Generalizability (Very high) | No, language too strong for strength of causal inference |
| Zucker, N., Copeland, W., Franz, L., Carpenter, K., Keeling, L., Angold, A., and Egger, H., Psychological and Psychosocial Impairment in Preschoolers With Selective Eating. <i>Pediatrics</i> , 2015. 136(3): p. e582-90                                                                                                                                                                                                                                                | Very low | Covariates (Very high)                            | Yes, language matches strength of causal inference       |
