# Supplementary material for: Causal language and strength of inference in academic and media articles shared in social media (CLAIMS): A systematic review
Source: PubMed Central journal article supplement (PMC5976147; doi:10.1371/journal.pone.0196346), 2018-05-30
Supplement: pone.0196346.s005.pdf [file pone.0196346.s005.pdf]

| Author(s)                    | Headline                                                                                              | Domain               | Facebook shares | Twitter shares | Language matches scientific article |
|------------------------------|-------------------------------------------------------------------------------------------------------|----------------------|-----------------|----------------|-------------------------------------|
| Chris Mooney                 | Scientists have discovered that living near trees is good for your health                             | washingtonpost.com   | 61,771          | 2,919          | Yes, language matches               |
| Amy Kraft                    | Cat parasite Toxoplasma gondii linked to mental illness, schizophrenia                                | cbsnews.com          | 38,125          | 1,663          | No, language stronger in media      |
| Anahad O'Connor              | Cutting Sugar Improves Children's Health in Just 10 Days                                              | nytimes.com          | 18,949          | 3,245          | Yes, language matches               |
| Denise Grady                 | Happiness Doesn't Bring Good Health, Study Finds                                                      | nytimes.com          | 4,373           | 2,790          | Yes, language matches               |
| Allison Aubrey               | Drink To Your Health: Study Links Daily Coffee Habit To Longevity                                     | npr.org              | 17,260          | 1,904          | Yes, language matches               |
| Not listed                   | Jeremy Hunt 'misrepresented weekend deaths data'                                                      | bbc.co.uk            | 3,512           | 2,458          | No, language stronger in media      |
| Joe Romm                     | Exclusive: Landmark Study Finds Elevated Carbon Dioxide Levels Impair Human Brain Function            | thinkprogress.org    | 2,917           | 2,206          | No, language stronger in media      |
| Sanjay Gupta                 | Cutting back sugar improves kids' health in 10 days                                                   | cnn.com              | 13,264          | 918            | No, language stronger in media      |
| Tara Haele                   | Delayed Umbilical Cord Clamping May Benefit Children Years Later                                      | npr.org              | 12,642          | 847            | Yes, language matches               |
| Sue McGreevey                | Relaxation response proves positive                                                                   | harvard.edu          | 3,909           | 1,626          | Yes, language matches               |
| Charlie Cooper               | Has a new academic study revealed the true cost of Iain Duncan Smith's welfare reforms                | independent.co.uk    | 1,939           | 1,563          | Yes, language matches               |
| Alan Zarembo                 | Black patients fare better than whites when both get same healthcare, study finds                     | latimes.com          | 420             | 1,495          | No, language stronger in media      |
| Evan Deflippis, Devin Hughes | New Study Finds No Advantages to Defensive Gun Use                                                    | thetrace.org         | 8,161           | 578            | No, language stronger in media      |
| Donald G. McNeil, Jr         | H.I.V. Treatment Should Start With Diagnosis, U.S. Health Officials Say                               | nytimes.com          | 1,915           | 1,463          | Yes, language matches               |
| Deborah Netburn              | Science proves what you suspected: hiking's good for your mental health                               | latimes.com          | 6,588           | 1,107          | No, language stronger in media      |
| Allison Aubrey               | Childhood Stress May Prime Pump For Chronic Disease Later                                             | npr.org              | 6,363           | 1,141          | Yes, language matches               |
| Amy Kraft                    | New research on heart health benefits of chocolate                                                    | cbsnews.com          | 6,282           | 499            | No, language stronger in media      |
| Ariana Eunjung Cha           | Good news for chocolate lovers: Study suggests the more you eat, the lower your risk of heart disease | washingtonpost.com   | 5,568           | 198            | No, language stronger in media      |
| James Gallagher              | Low-fat diets 'better than cutting carbs' for weight loss                                             | bbc.co.uk            | 2,494           | 1,303          | Yes, language matches               |
| Not listed                   | Drinking Coffee Gives You A Stronger Penis According To New Study                                     | instinctmagazine.com | 5,411           | 177            | No, language stronger in media      |
| Jan Hoffman                  | Children's Lung Health Improves as Air Pollution Is Reduced, Study Says                               | nytimes.com          | 981             | 1,143          | No, language stronger in media      |
| Kelly Wallace                | Kindergartners' behavior tied to adult success                                                        | cnn.com              | 4,419           | 603            | No, language stronger in media      |
| Peter Walker                 | Horror health warning? Scary films really can curdle the blood                                        | theguardian.com      | 371             | 1,040          | No, language stronger in media      |
| James Gallagher              | Palm 'holds secrets of future health'                                                                 | bbc.co.uk            | 1,016           | 939            | Yes, language matches               |
| Carolyn Gregoire             | How Green Spaces In Schools Can Optimize Students' Learning And Productivity                          | huffingtonpost.com   | 3,699           | 366            | No, language stronger in media      |
| Karen Kaplan                 | Bullying does more long-term mental health harm than abuse, study says                                | latimes.com          | 1,917           | 937            | Yes, language matches               |
| Sarah Boseley                | Health threat of sugar is vastly underestimated, study                                                | theguardian.com      | 2,602           | 908            | Yes, language matches               |
| Ashley Welch                 | Coffee drinking linked to a longer life                                                               | cbsnews.com          | 3,570           | 637            | No, language stronger in media      |
| Andrew M. Seaman             | Pill protects against HIV in real-world settings                                                      | yahoo.com            | 34              | 889            | No, language stronger in media      |
| Candy Sagon                  | Some Acid Reflux Medication Could Increase Heart Attack Risk                                          | aarp.org             | 3,280           | 66             | Yes, language matches               |
| Not listed                   | Coffee-drinkers less likely to die from certain diseases                                              | yahoo.com            | 2,117           | 824            | Yes, language matches               |
| Linda Carroll                | 'No head trauma is good head trauma': Kids' sports under scrutiny                                     | today.com            | 3,198           | 142            | No, language stronger in media      |
| Roni Rabin                   | C-Sections Are Best With a Little Labor, a Study Says                                                 | nytimes.com          | 2,321           | 820            | No, language stronger in media      |
| Jill Layton                  | Research says, having a dog as a kid is amazing for your mental health                                | hellogiggles.com     | 3,173           | 30             | No, language stronger in media      |
| Ben Spencer                  | Why firstborn girls are more likely to get fat                                                        | dailymail.co.uk      | 2,876           | 72             | Yes, language matches               |
| Michael Greenwood            | Negative beliefs about aging predict Alzheimer's disease in Yale-led study                            | yale.edu             | 545             | 740            | Yes, language matches               |
| Not listed                   | Coffee Prevents Heart Attacks, Study Says                                                             | sky.com              | 2,825           | 330            | No, language stronger in media      |
| Ian Johnston                 | Angry, stressed or depressed? Gardening can help, new study finds                                     | independent.co.uk    | 1,463           | 724            | Yes, language matches               |
| Sarah Boseley                | Bullied children have 'greater mental health risks' than those maltreated by adults                   | theguardian.com      | 749             | 721            | Yes, language matches               |
| Linda Carroll                | 'Drip, drip, drip' of daily stress: Single parenting takes health toll                                | today.com            | 2,780           | 55             | No, language stronger in media      |
| Paige Turner                 | How You Get Pregnant Has a Correlation to Your Child's Risk of Autism                                 | theautismsite.com    | 2,747           | 19             | No, language weaker in media        |
| Ashley Welch                 | Picky eating in kids could be sign of bigger health concerns                                          | cbsnews.com          | 2,718           | 200            | Yes, language matches               |
| Monica Tan                   | More trees on your street means fewer health problems, says study                                     | theguardian.com      | 2,699           | 514            | Yes, language matches               |
| Samantha Bonar               | Coffee consumption linked to lower melanoma risk                                                      | latimes.com          | 2,544           | 460            | No, language stronger in media      |
| Eric Jaffe                   | Why Having Access to Public Transit Might Be Good for Your Mental Health                              | citylab.com          | 939             | 670            | Yes, language matches               |

|                     |                                                                                                                               |                    |       |     |                                |
|---------------------|-------------------------------------------------------------------------------------------------------------------------------|--------------------|-------|-----|--------------------------------|
| Meredith Engel      | Microwaving food in plastic linked to diabetes: study                                                                         | nydailynews.com    | 2,311 | 82  | No, language stronger in media |
| Gina Kolata         | Heart Scan Can Fine-Tune Risk Estimate for Patients Considering Statins                                                       | nytimes.com        | 355   | 659 | Yes, language matches          |
| Adrian Garcia       | Study Finds Drinking Lots Of Coffee Makes Your Penis Stronger                                                                 | thegailygrind.com  | 2,141 | 73  | No, language stronger in media |
| Sarah Knapton       | Marriage is more beneficial for men than women, study shows                                                                   | telegraph.co.uk    | 1,186 | 640 | No, language stronger in media |
| Not listed          | Coffee may reduce risk for malignant melanoma                                                                                 | cbsnews.com        | 1,397 | 639 | No, language stronger in media |
| Amy Kraft           | Cat videos may be good for your health                                                                                        | cbsnews.com        | 2,083 | 313 | Yes, language matches          |
| Kathryn Doyle       | Mindfulness meditation may improve memory for teens                                                                           | yahoo.com          | 11    | 610 | No, language weaker in media   |
| Rose Troup Buchanan | What happens to your body after you give up sugar                                                                             | indiatimes.com     | 2,072 | 100 | Yes, language matches          |
| Kashmira Gander     | How watching cat videos is good for you                                                                                       | independent.co.uk  | 384   | 603 | Yes, language matches          |
| Jada Green          | Want a stronger penis? Drink more coffee                                                                                      | nypost.com         | 1,993 | 148 | No, language stronger in media |
| Lisa Rapaport       | Hypertension in pregnancy linked to future heart disease                                                                      | yahoo.com          | 4     | 597 | No, language weaker in media   |
| Peter Whoriskey     | How risky are bacon and hot dogs? Depends on your DNA.                                                                        | washingtonpost.com | 152   | 566 | No, language stronger in media |
| Karen McVeigh       | Fit-for-work tests may have taken serious toll on mental health – study                                                       | theguardian.com    | 765   | 560 | Yes, language matches          |
| Not listed          | Lack of vitamin D may cause multiple sclerosis, study finds                                                                   | theguardian.com    | 1,879 | 218 | Yes, language matches          |
| Tania Kohut         | Children with pet dogs have less anxiety: study                                                                               | globalnews.ca      | 1,853 | 20  | No, language stronger in media |
| Patti Neighmond     | Mellow Pastimes Can Be Good For Your Health, Too                                                                              | npr.org            | 12    | 557 | No, language stronger in media |
| Sergio Perez        | 'Fluoride in water could cause depression, weight gain' – scientists                                                          | rt.com             | 382   | 543 | Yes, language matches          |
| Laken Howard        | Bisexuals Report Poorer Health Than Gay And Straight Peers, New Study Finds, Plus 3 More Reasons We Need to Be More Accepting | bustle.com         | 1,639 | 8   | Yes, language matches          |
| Kathryn Doyle       | Stereotyping makes life harder for young female surgeons                                                                      | news.yahoo.com     | 3     | 523 | No, language stronger in media |
