# Supplementary material for: Causal language and strength of inference in academic and media articles shared in social media (CLAIMS): A systematic review
Source: PubMed Central journal article supplement (PMC5976147; doi:10.1371/journal.pone.0196346), 2018-05-30
Supplement: pone.0196346.s006.pdf [file pone.0196346.s006.pdf]

**Study Results**

**Strength of Causal Academic Study**

**Academic Study**

|          | Strength of Causal Inference |     |          |      |           |
|----------|------------------------------|-----|----------|------|-----------|
|          | Very low                     | Low | Moderate | High | Very high |
| Strong   | 2                            | 2   | 5        | 0    | 1         |
| Moderate | 2                            | 10  | 1        | 1    | 1         |
| Weak     | 4                            | 15  | 6        | 0    | 0         |

**Strength of Causal Media Article**

**Media Article**

|          | Strength of Causal Language |          |        |
|----------|-----------------------------|----------|--------|
|          | Weak                        | Moderate | Strong |
| Strong   | 12                          | 15       | 10     |
| Moderate | 8                           | 7        | 1      |
| Weak     | 8                           | 3        | 0      |

**Strength of Causal Media Article**

**Media Article**

|          | Strength of Causal Inference |     |          |      |           |
|----------|------------------------------|-----|----------|------|-----------|
|          | Very low                     | Low | Moderate | High | Very high |
| Strong   | 7                            | 14  | 5        | 0    | 2         |
| Moderate | 3                            | 14  | 7        | 1    | 0         |
| Weak     | 2                            | 6   | 3        | 0    | 0         |
